# Supplementary material for: A visible-light-responsive TaON/CdS photocatalytic film with a ZnS passivation layer for highly extraordinary NO2 photodegradation
Source: Royal Society of Chemistry journal article supplement (doi:10.1039/d0ra01056a), 2020-01-01
Supplement: d0ra01056a1.pdf [file d0ra01056a1.pdf]

Supporting Information

Visible-light-responsive TaON/CdS photocatalytic film with ZnS passivation layer for highly extraordinary NO<sub>2</sub> photodegradation.

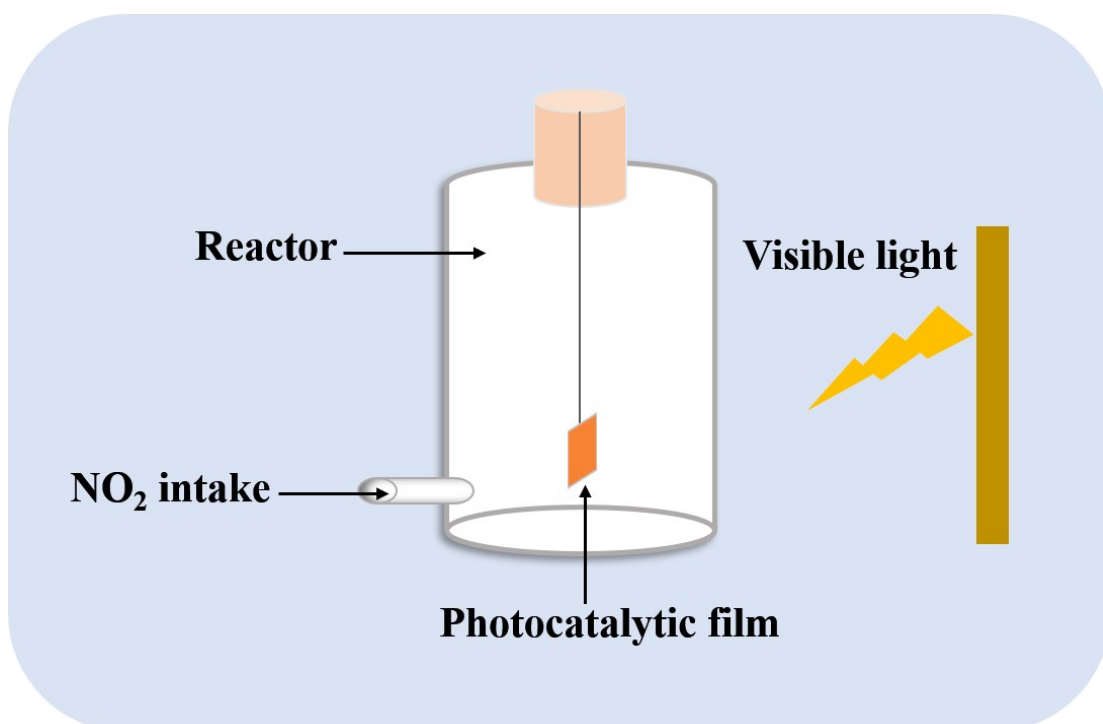

**Fig. S1** The reaction scheme for NO<sub>2</sub> photodegradation system.

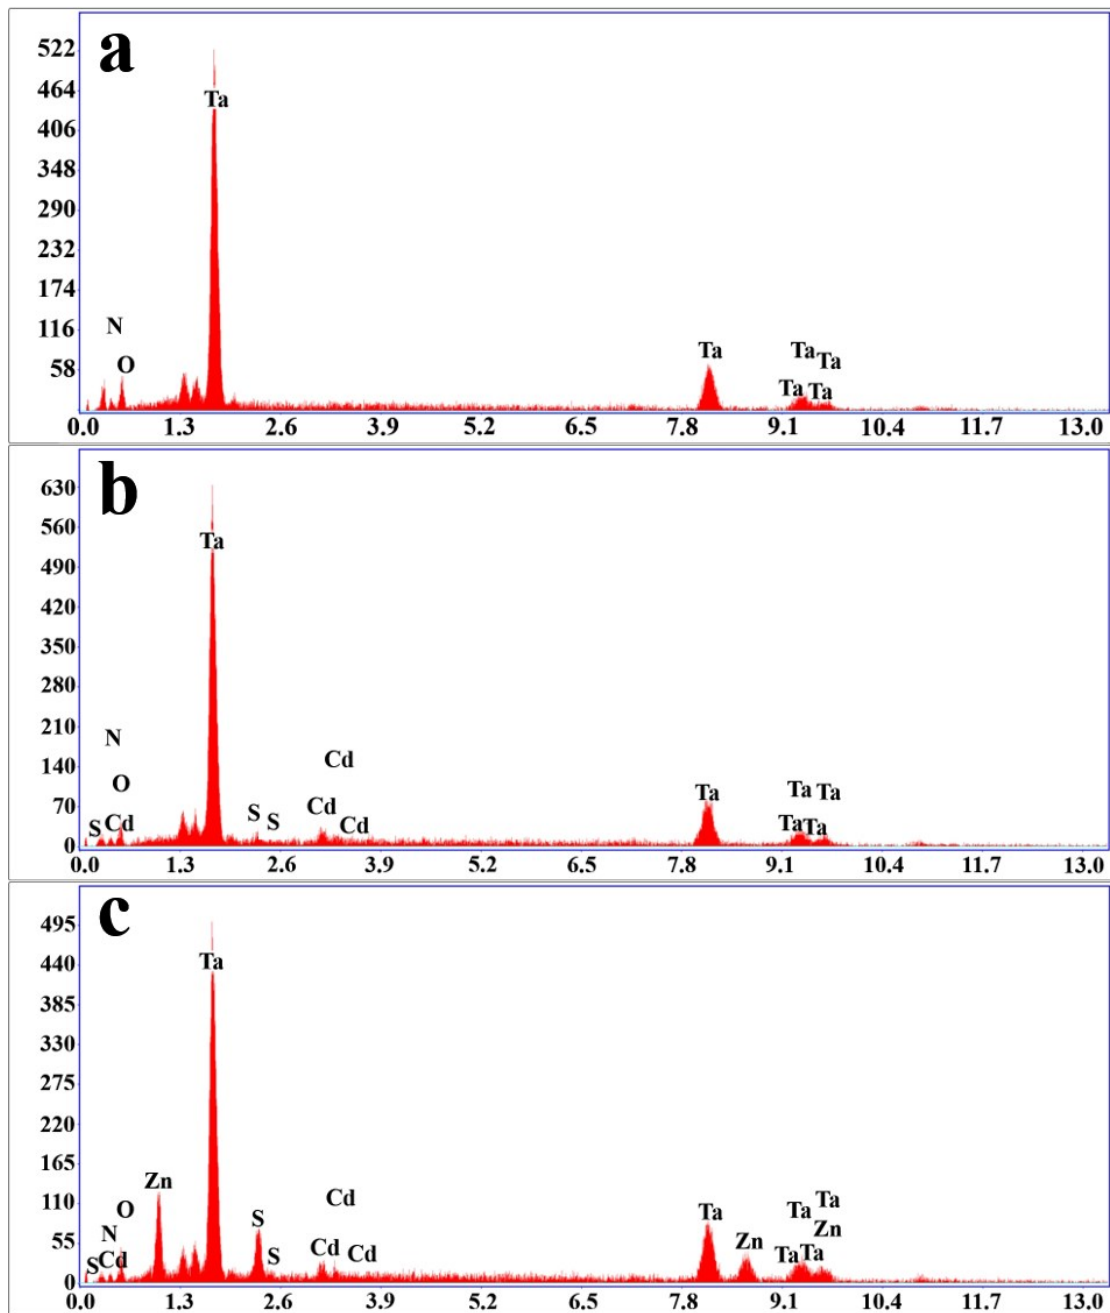

**Fig. S2** The EDX analysis of (a) TaON film (b) TaON/CdS film and (c) TaON/CdS/ZnS film.

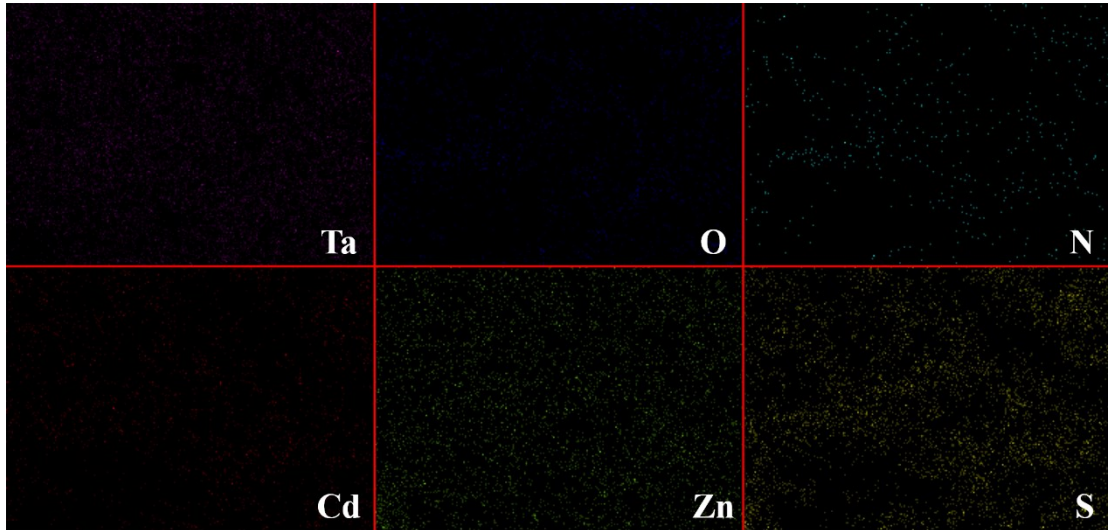

**Fig. S3** The SEM EDX elemental mapping of Ta, O, N, Cd, Zn and S for the TaON/CdS/ZnS film.

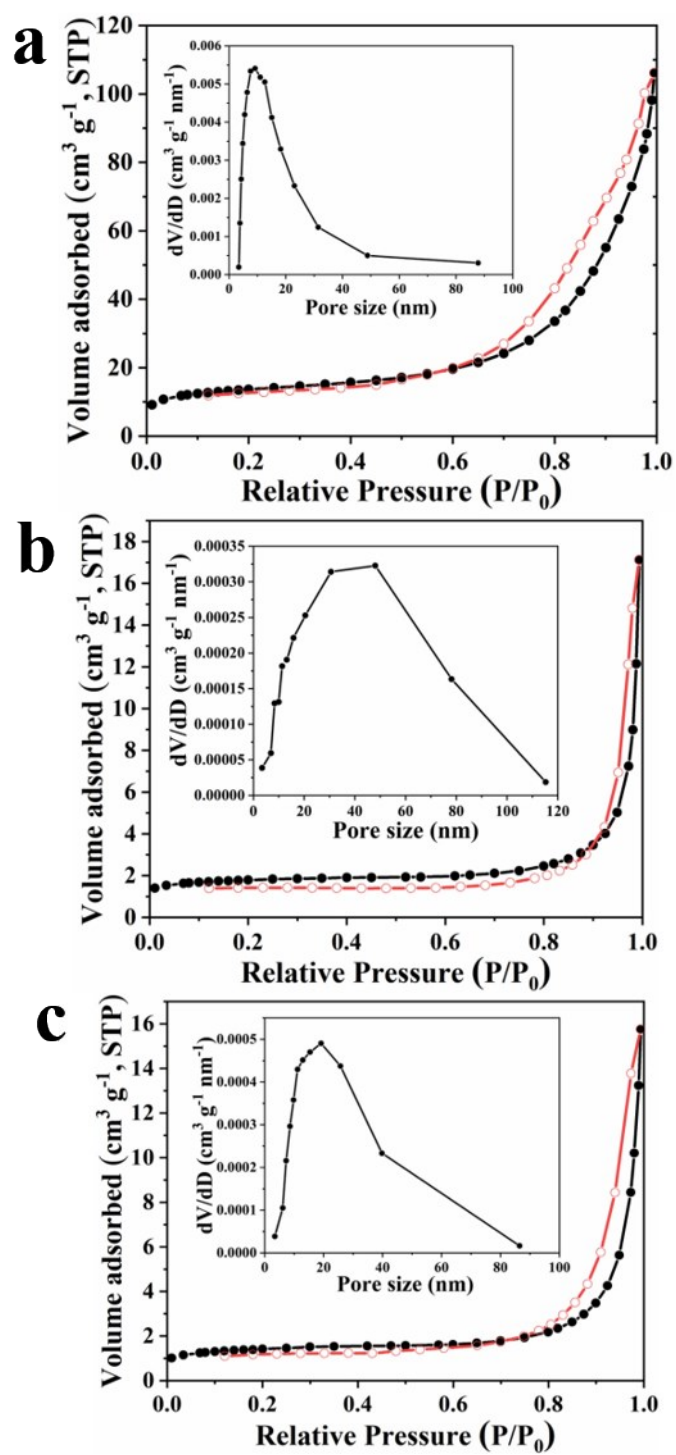

**Fig. S4** N<sub>2</sub> adsorption-desorption isotherms at 77 K and the corresponding PSD for TaON (a), TaON/CdS (b) and TaON/CdS/ZnS (c).

**Table S1** Summary of BET dates of all photocatalytic films.

| Photocatalytic film | $S_{\text{BET}}$ ( $\text{m}^2/\text{g}$ ) | Pore volume ( $\text{cm}^3/\text{g}$ ) | Pore size (nm) |
|---------------------|--------------------------------------------|----------------------------------------|----------------|
| TaON                | 47.56                                      | 0.16                                   | 10.91          |
| TaON/CdS            | 6.12                                       | 0.03                                   | 46.70          |
| TaON/CdS/ZnS        | 4.93                                       | 0.02                                   | 24.64          |

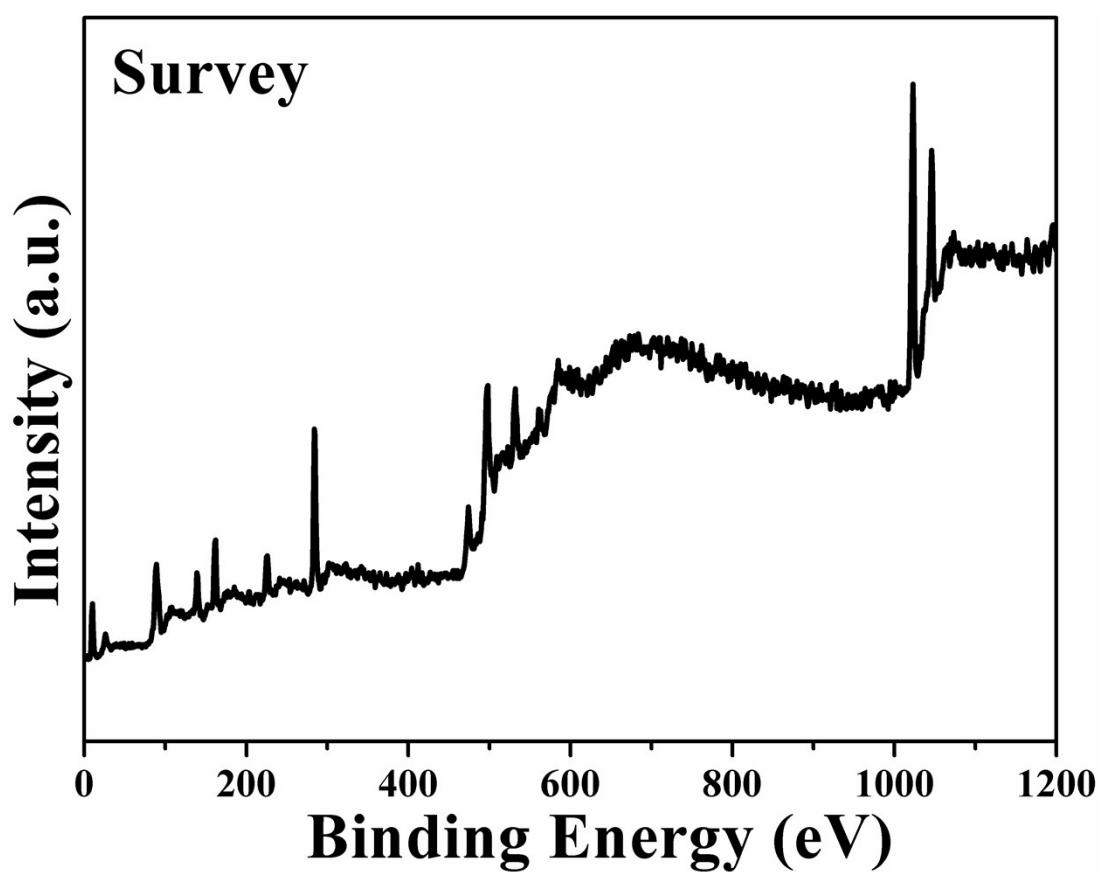

**Fig. S5** XPS survey spectra of TaON/CdS/ZnS composite film.

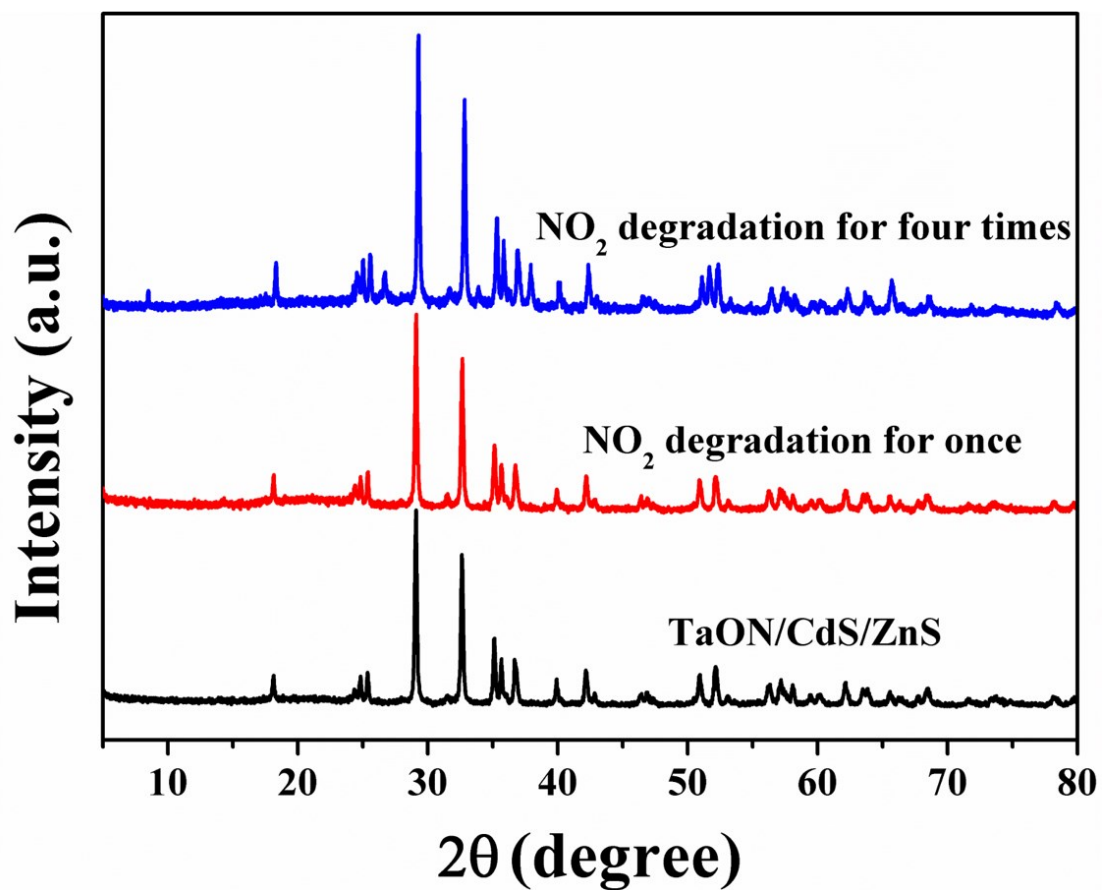

**Fig. S6** XRD patterns of cycled NO<sub>2</sub> photodegradation over TaON/CdS/ZnS film. It shows a few more peaks after NO<sub>2</sub> degradation for four times, which may be owing to a small amount of TaON reduction in NO<sub>2</sub> degradation for four times.
